# Supplementary material for: Exploring Entrainment Patterns of Human Emotion in Social Media
Source: PLOS journal article supplement (doi:10.1371/journal.pone.0150630), 2016-03-08
Supplement: S1 (10.1371/journal.pone.0150630.s001) [file journal.pone.0150630.s001]

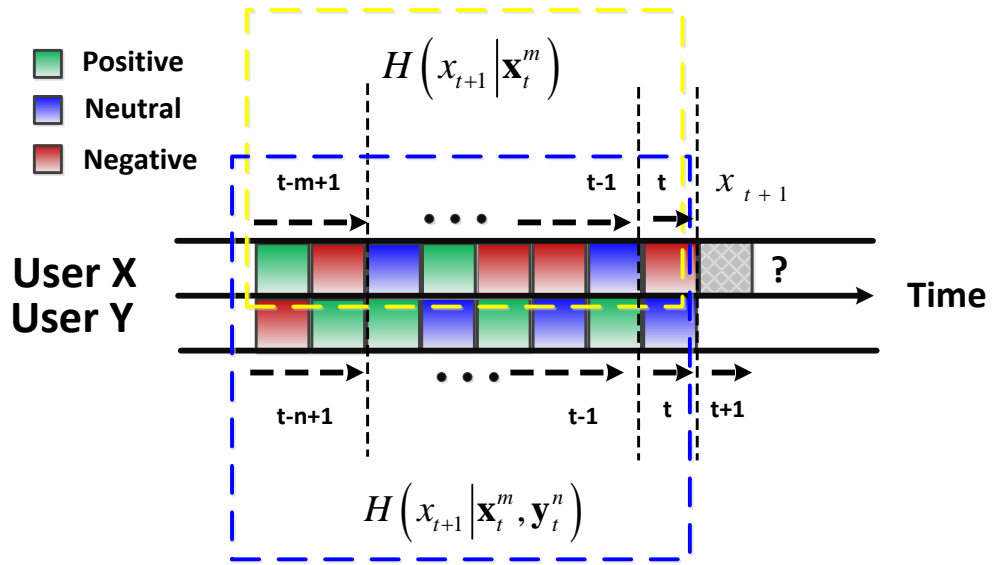

**S1 Fig. Illustration of entrainment quantification.**  $H(x_{t+1} | \mathbf{x}_t^m)$  amounts to the uncertainty about user  $x$ ,  $H(x_{t+1} | \mathbf{x}_t^m, \mathbf{y}_t^n)$  amounts to the uncertainty about user  $x$ , if we know the emotions of user  $y$ .
