# Supplementary material for: Exploring Entrainment Patterns of Human Emotion in Social Media
Source: PLOS journal article supplement (doi:10.1371/journal.pone.0150630), 2016-03-08
Supplement: S4 (10.1371/journal.pone.0150630.s004) [file journal.pone.0150630.s004]

**Table 3. Features Used in Emotion Prediction.**

| Feature Type |             |          | Description                                         | Example                                   |
|--------------|-------------|----------|-----------------------------------------------------|-------------------------------------------|
| Entrainment  | Association |          | Association among users                             | $Etr(v_i \rightarrow v_j)$                |
|              | Patterns    | Dual     | Reciprocal entrainment                              | $G(v_i, v_j)^*$<br>$SG(v_i, v_j)^{**}$    |
|              |             | Single   | Single entrainment                                  | $G(v_i, v_j)^*$<br>$f(\mathbf{D}_i)^{**}$ |
| Modality     | Emotion     | Uni-Gram | Emotion status at each timestamp                    | POS_1,<br>NEG_2 ...                       |
|              |             | Bi-Gram  | Emotion dependence existing in different timestamps | POS_1-NEG_2<br>...                        |
|              | Activity    | Uni-Gram | User activity at each timestamp                     | Low_1,<br>Medium_2,<br>High_3, ...        |
|              |             | Bi-Gram  | Activity correlation across different timestamps    | Low_1-High_3,<br>...                      |

Note: All features are extracted within a sliding window of 4 timestamps.

Numbers in features are relative positions to the timestamps for prediction.

\* : features only used for EnFG; \*\*: features only used for comparison methods.
